# Supplementary material for: Evx2-Hoxd13 Intergenic Region Restricts Enhancer Association to Hoxd13 Promoter
Source: PubMed Central journal article supplement (PMC1766471; doi:10.1371/journal.pone.0000175), 2007-01-24

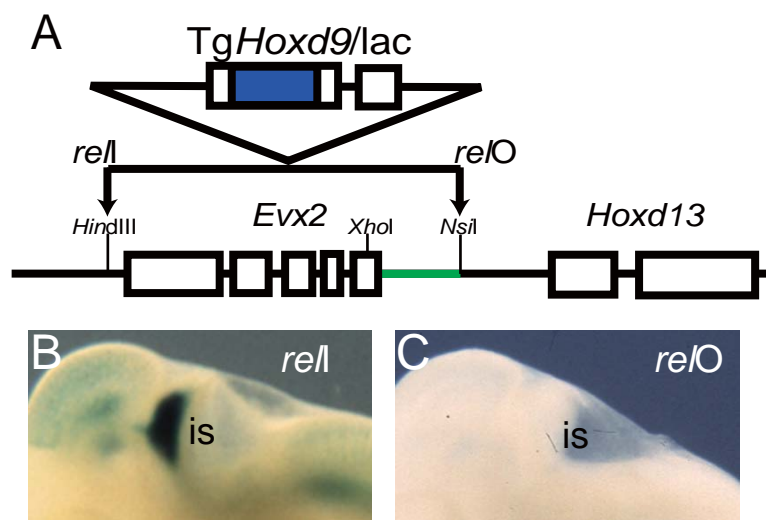

Supplement: pone.0000175.s001.pdf [file pone.0000175.s001.pdf]
