# Supplementary material for: Evx2-Hoxd13 Intergenic Region Restricts Enhancer Association to Hoxd13 Promoter
Source: PubMed Central journal article supplement (PMC1766471; doi:10.1371/journal.pone.0000175), 2007-01-24
Supplement: pone.0000175.s002.pdf [file pone.0000175.s002.pdf]

A

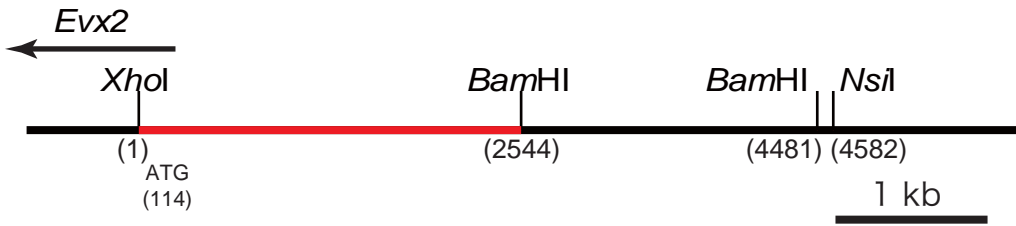

B

CTCGAGCACA GCACCGCCAG CTGAATCGGA CAAACTGGAG AACCTCTTGC CAGCAGTAGG GCTGTGGAGC CCTCTTTCCA TCAGAATCAT CTCTTTTCTT  
ATTCTTTCCA **TCAT**CTCAGC TTTCTAAAAA ATGTCACAGT GGCCTGGCTG TCCCGTCTTA ATGATGGGCT GCGCCCAGGG CTGATTCTCA TTCAGCCCCA  
**Evx2 start codon**  
GCAAGCGGCT CTAAATATTA TTATCTCTTT TGGAGGGAGG CGAAAAAAT TGTGGGATGC CAGAGCGAGG GAATGACTGG TCAAAATGAC CCATACATCC  
TTCCGAGTCG GAGATGTCAT TCATCAAAAA GTAGCGCCCG CTCGTCATTA AGGTACGAAT GACGCCGTTT GAATAATCAT TTATGTAAAC AGGTTTATAA  
GCAAAATAAT ACACGCTCCT GTCAGTGGGT AATGAAGGCG ACTTCAGAGC AGACAAATAG ATCCAGGTAG GAGACGAGAA GACACGAGAA GTGAGGAAGA  
AGGCTCCGGT CCTTTGCCCG CTCCAGCCA GTTCTGCTCG CCCGGGGGTT TGGCCTCGGG GGTGAAATTG ACAGTCTGAT TAATAGAGCA CGCCGCGGCG  
CATTTCCCCC TTCATTTAGG GGCATCATTG CGCTCTCAGT TTGCTGGGTT GCCCCTTAGG TCCTAATCAT GCAGCGCCTT CCTCATTCTT CCACGAACAC  
AGATACGTGT TAAATAATAG ATAATGCTTT GATTTTTCCA GGGTAGATTC TTGAGAAGTT TTGTTTTTGT TTTGTTTTGT TTTGTTTTGC CTTAACATTT  
ACAAGCTGGG GCGTAAGGG GGGCGGGTAA AGGGGAGGAT ACAGGAAGAG TTGCGTAAGA AGACCTCGCG CCCACTCCTG TCAGGATTAC TTATCTTTCT  
GTTTTAAGAA CCAAATATTA ATAATGAGTA TTTTATTTAA CAAATAGAAT TCTGAGTTCT TTCTCTCTCC TTACTTTTTT CTCTCAGTCT TGATTCTCCC  
CTCCAACACA CACACACACA CAGAGAGAGA GAGAGAGAGA GAGAGAGAGA GAGAGAGAGA GAGAGAGAGA ATATATCTTG TAGACTTTTG AAAATGCTTT  
CTTGCTACGT GGCTGAGGAG GTACACAGGA CCCGTGCCGT GCCTCCAAGT GGAAATCATT ACATCTTCTC TTATTTTCTA CCACTGCTTG CAGGCTAACT  
TCTGAACTCG AAGACCTTAG ATTTTTTGT TTATAATCCT CTGATGGATA AGCTTCTCAC CCTCGCATTG TCCCTTAGGG GAAATAAACT AGACTGGAGG  
ATCTGATAGT AGAAATGAC AGCTAACTTT AAACACAATC ATGATTTACC GTACCATAGC TCCCCATCAC AGAACCCTACT TTTTAAAAAT GCCGGCTTTC  
TCCCACCCTT CTCAAATAGA GGAATTCGTG GTGAAGTAAC TGGGTTTTGG GGGTCAAAGT GGAGGAATG GAATCTCCTG CTGCCTCCCT TCCTTTCCCA  
CTTTGTCTTT CTTCACCTTC TCCATCCTCC CCCTCCTCCA CCCTAGGCCC TTACCTGTGG CCCCCGGTGT TCCTGGTGCT GACTGGGGGC ACAGAGAGTC  
TCCAACCAGC CTTGCCTCTT CTCCTTCCCG CCTGAGGCTG GAGGCTGAGC CTCTTGCGCA TAACTTTGAT AGTCATAATG ACGCCGGTGG CAACCATTTT  
AAGGAAGATC AATCTTCACT CAAATGCGCT CATCTCCTCC CGCGCTTGGC CCCACCCTG CCCGACTCAG ATGCGTCTGT CCAGTTTGCC CGCCTGCTGC  
CCCAGAAGCA GAGCTTTGTC CGCACTGGCG AGGTCCACGG AAGACAGGGA CAGGACACAG TGGTCTAGCG CGTGAGCTTC CGAAGCAGCC TAGAGAGCCT  
GGCAGTCTTG ATGCTGGTTT TGCATCCCGG TCACAGGACT AACTGAGACC CTAACCCGGG CCCCCCTCT TCCCGCCTTG AGACACACCC AGCATATTGG  
GGTGTGTTAG GGGGTAAACC TCTGATCTAA TTGCCATCT GTCTGTTGGC GCTTCTTTT TAACCTTGA CCCGTTGGGG GCGCGTCAAG AATGTAAGGG  
GAGGTGAGGT GTGAAATATA TTTATATACA TGTGTATACA TATATAGTCA ATGCCAAAAG TTTTTCACCT CTTCCCTTA GCGCCAACCT ATTTCTACAG  
GCAAGCTTGC TGGAAAAAAA AAAAAAAAAA AAAAAAAAAA CAATCCCACC TCTTTAAAGT TGTAAGTGA AAATGTCATA GGCTCGCAGG CTTAGGAGAA  
TTGTCTGGTG GCGATGACC TCCATTTGAG AATTGACCC AGCATCCACC TTTGCCCTG TCCCAGTGGC TATTCTACCC TAGTGGTCAT TCAGTTCCTG  
GCACTTGCAT TGCTCTCAAG CAGGATTTTG GCTACCTCTC TFCGCTAATC ACACGTCCAG CTCTGCGGGC GCCCCAACT GCTTCTCAGC CAGGACGCCC  
AGCTCCACCG GTCCAGGCAG TCTGGGCCCC AGTGTCTCTG GGAGGATCC
