# Supplementary material for: Evx2-Hoxd13 Intergenic Region Restricts Enhancer Association to Hoxd13 Promoter
Source: PubMed Central journal article supplement (PMC1766471; doi:10.1371/journal.pone.0000175), 2007-01-24
Supplement: pone.0000175.s003.pdf [file pone.0000175.s003.pdf]

A

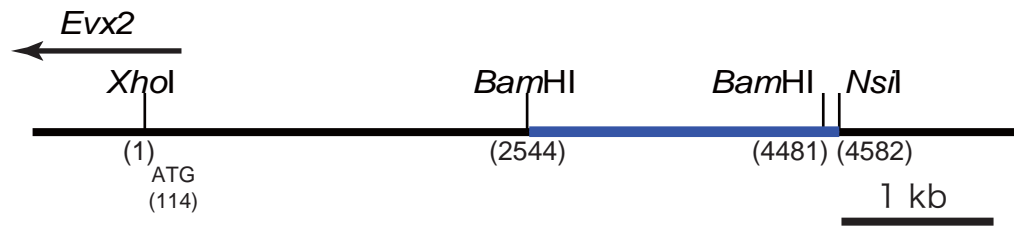

B

GGATCCTGCT ACCTAATCCT TCTCTACCCA AGGGACTAGA AGAGAATCTT TGGTCTAGGC TAGGCTCCAT GGGGGGCCAA GACCCTGGCA GCAAGTGGTC  
GCTCAGCCTG GCGGAAATC CGCCGATGCC TTTATTGCTG TCATTTGGCG CCCCACATCG TTTTCCTCGC GGTTCAGCA GCTGTGAGCT GCTTTTCTGT  
CGCAGAAACC TCAGTGGCCT AGGAAGATT CTTACCTTCT TCTACGACCC ACCGCCTCTG GTTCCAAAAG CTGGCCAAGT ACGACTCCAC TCTACTGAAA  
ATGAAAAAAA AATCATTTCT CCGCGACACC TTCATTCATT AGTGGTTTTG AACTACCTT GCACCTTTTA AGTAACACTG ATACTGCATT TCCAGGATGT  
CTATTGCCCC ACATATACTT GTGATCTTGT CAGGGAAACT ACCTCAATGA AAAACATCCA TAACTTTTCA CTGCCCTTAG CAGAGGATAG CATTTCACAG  
TGACTATTCC ATTTGAATAG TTAATGTTCC TTTAGAACAT TACCTATTAC TAGTAATAAT ATTGACTAAT TTGTATAACT CATTTAGTAT ACAATTACAA  
GTGGCTTTTT ACATAGATCT ACCTTCTGAA GACCAGAGAA CCCCTGGGGA ATTGCCCGC CCCTTTAAGG AAACCTCCTA CACAGAGAGC TTTGGTAATT  
GTTTCATGGTT TATACTTATC TCCAATAATG GATGTCATGG GGGGTGAAA GTTTTGCATA ACCGCTTTTT TTTTCTTCA TGTTACCTGT CTTATTTAAA  
GGCAGGCCCTA CCTCAAAAAC ATTACACCAG TGGAGGAGAG AGAGAGAGAG AGAGAGAGAG AGAGAGTTAC ATTTGTTGAA AAAATAGTCA TTTTCATATCC  
TTTCAGAAA GGAGAGGATG AAATTAGAAA TGGACCCAGT TTTCAGTTTC TGATATCTTC AAAGTACCAT CACCAAGAAC AAGAACACTC AGACAAAAAT  
CTAACCCAAA CCCCATGCCT TCAAAGGGCA TCTTCCACCT ATGCGAAGGG CATGCCAAAT TTTTAAGATT GGGAGTGAGG TGACATACAG GAAAAAATTT  
CTCTGTATTA CCCAAAAGA ACAGTTTTGC TGGCAAGAAT GATGTAAACA AAGCAAGGGC ATTTTCTTTT CCTCCTTTTCT TTTTCTCCT TCCTTCCTTT  
CTTCCTTCCT TCCTTCCTTC CTTCCTTCCT TTCTTTCTTT CTTTCTTTCT TTCTTTCTTT CTTTCTTTCT CCTGGGGTGG GGTAGACTG CCAAATAAG  
TATTTGTTTC TTGTAAACAG TGAACATTTG ACCTGTGACT TCAGGTAAA ACTTGTCTTA GACTTGCAGA GGGATGGGTC AAGAGTAAAG CCCCCTCGAG  
CAGCAACAGG GCCACGGGAT GCGGTGGTCT CACCCAGCTC TGGGCTTCCC GGTGGAAGAT GCCAGCCACC CGTTCTCAAC CCGAAGTAAG TCTCAAGCTC  
GCTGGAGAAC TTATGGGAGT GCAGATGTTG TGAACGGGCA GTAAACACCT GCAGAGTCTG AGCTGCGGGC AGGGCATGTT TTCTTTAGGC TAAGTGTGGT  
CTTCAGGACC AGGTTTCGAT TTATAAGAGA GGGTGAGGGT TGGACTAAC AAGCCAGTCT TCTAGGCTTC CTACTCTCAT TTCTCCTCAG GCAAGCCTCT  
AGCTTTCTGC CTCGCCTGGG TCAGCTCATT TAATTTAGTT TTCCTTCTCC CCTCCACCTT CAACTCCAAG TTACCCTAGA ATGGTTGTAA GTGAGGGAAT  
TGGTGGCTAC TTTCTTCTG GACCCCGAGG CTAATCAGAT TTGCCAACTG CCAGGAGTTT AATGTACCCT CAGATCAGAC CCAAGAACTT GCAGGGACAT  
CTAGCGCCAA GCGCGGGGAA CTGCGGTTCG CTTTCAGGGA TCCGGAGCAT ACCACTGGCA TCCTTTGCCA GTCTCTCAAC TCCTTCTACA TTTTLAGGCA  
TTTTCTTACC CTTACCCGC TTTGCTTCG TGCTATGCAT
